# Supplementary material
Source: publisher figshare collection journal article supplement (https://springernature.figshare.com/ndownloader/files/21687579)
Supplement: Supplementary file [file 21687579]

## Additional file 1: Critical appraisal tool

### Judgment for the items:

|                           |                                     |                          |                               |
|---------------------------|-------------------------------------|--------------------------|-------------------------------|
| <input type="radio"/> Yes | <input type="radio"/> Partially yes | <input type="radio"/> No | <input type="radio"/> Unclear |
|---------------------------|-------------------------------------|--------------------------|-------------------------------|

### Items of the critical appraisal tool:

|            |                                                                                                                                                                                                                           |  |
|------------|---------------------------------------------------------------------------------------------------------------------------------------------------------------------------------------------------------------------------|--|
| <b>1.0</b> | Did the review address a <b>clearly focused question</b> in regards to the decision-making process to be explored?                                                                                                        |  |
| 1.1        | Was the <u>type of decision-making process</u> clearly defined?<br>(e.g. priority setting, resource allocation, decision-making process employing MCDA)                                                                   |  |
| 1.2        | Was the <u>topic</u> of the decision-making process clearly defined?                                                                                                                                                      |  |
| 1.3        | Were the <u>institutions or stakeholders</u> to be supported in the decision-making process clearly defined?                                                                                                              |  |
| <b>2.0</b> | Did the review employ a <b>comprehensive search strategy</b> ?                                                                                                                                                            |  |
|            | Whether a search strategy is adequate depends on the research question. While items 2.1 to 2.5 inform this judgement, they do not all have to be answered positively for a search strategy to be judged as comprehensive. |  |
| 2.1        | Were at least two relevant databases searched?                                                                                                                                                                            |  |
| 2.2        | Was a hand search of the references conducted?                                                                                                                                                                            |  |
| 2.3        | Were attempts undertaken to identify grey literature?                                                                                                                                                                     |  |
| 2.4        | Were experts consulted?                                                                                                                                                                                                   |  |
| 2.5        | Were key words and/or a search strategy provided?                                                                                                                                                                         |  |
| <b>3.0</b> | Was the <b>selection of eligible studies adequate</b> ?                                                                                                                                                                   |  |
| 3.1        | Did the review authors perform all stages of the screening of publications in duplicate?                                                                                                                                  |  |
| 3.2        | Were inclusion and exclusion criteria provided?                                                                                                                                                                           |  |
| <b>4.0</b> | Did the review critically <b>appraise the included primary studies</b> or assess whether included primary studies followed a rigorous process to identify criteria?                                                       |  |
| <b>5.0</b> | Were approaches undertaken to ensure that <b>all criteria</b> were <b>extracted comprehensively</b> from the publications included in the review?                                                                         |  |
| 5.1        | Did the review authors perform the extraction of the criteria in duplicate?                                                                                                                                               |  |
| 5.2        | Did the review extract all criteria from the primary studies, rather than only a sample or sub-set of criteria?                                                                                                           |  |
| <b>6.0</b> | Are the identified <b>criteria adequately described</b> in the review?                                                                                                                                                    |  |
| 6.1        | Does the study list criteria extracted from the primary publications?                                                                                                                                                     |  |
| 6.2        | Is it possible to track back all criteria to a primary publication?                                                                                                                                                       |  |
| 6.3        | Does the review describe the included studies in adequate detail to locate the criteria in context?                                                                                                                       |  |
| <b>7.0</b> | Can it be assumed that a <b>conflict of interest</b> has <b>not</b> influenced the results?                                                                                                                               |  |
| 7.1        | Did the review authors report any financial or non-financial sources of potential conflict of interest?                                                                                                                   |  |
| 7.2        | Can it be assumed that there is <b>no</b> risk that a conflict of interest could have biased the criteria selected and reported in the review?                                                                            |  |
| <b>8.0</b> | Does the review contain an <b>explicit statement</b> that the <b>methods</b> were <b>established prior</b> to the <b>conduct of the review</b> and did the report justify any significant deviations from the protocol?   |  |
